# Supplementary material for: Modeling leaderless transcription and atypical genes results in more accurate gene prediction in prokaryotes
Source: HighWire-hosted journal article supplement (doi:10.1101/gr.230615.117), 2018-05-17
Supplement: Supplemental_Materials.docx [file Supplemental_Materials.docx]

**SUPPLEMENTAL MATERIAL**

**Modeling leaderless transcription and atypical genes results in more accurate gene prediction in prokaryotes**

Alexandre Lomsadze1,4^, Karl Gemayel2^, Shiyuyun Tang3 and Mark Borodovsky1,2,4,5*

^ joint first authors,
*corresponding author, borodovsky@gatech.edu

1Wallace H. Coulter Department of Biomedical Engineering, 2School of Computational Science and Engineering, 3School of Biological Sciences, Georgia Tech, Atlanta, Georgia, 30332, USA, 4Gene Probe, Inc., 1106 Wrights Mill Ct, Atlanta, GA 30324, 5Department of Biological and Medical Physics, Moscow Institute of Physics and Technology, Moscow, Russia

**Principal equations of the Viterbi algorithm in the log-odds space**

In GeneMarkS-2, the number of states in the generalized hidden Markov model (GHMM) increased significantly compared to GeneMarkS. To simplify the Viterbi algorithm implementation, we moved from the standard use of (log) probability values, to log-odds scores (i.e. where the probability of emission of a sequence fragment along a given path of the hidden states was divided by the probability of emission of the same fragment from the non-coding state). When we compared the maximum value path in the log-odds space to the maximum likelihood path in the probability space we saw little or no difference. For the models of the first and higher orders the log-odds maximum value path was a close approximation of the maximum likelihood path. A comprehensive testing showed that the difference between the two types of implementations was concerned about ~ 3 genes out of 1,000. It was not clear which approach is more accurate for real data, since the range of possible errors in the test sets of validated genes was comparable with the effect we wanted to estimate.

In GeneMarkS-2, the gene prediction step in the first iteration did not use any species-specific parameters (i.e. the parameters of the ‘typical’ model). At this iteration the coding ( and non-coding models for every candidate gene were taken ‘from the shelf’, from the array of *heuristic* ‘atypical’ models. The models selected for the use were supposed to have the GC index matching the GC composition of the candidate gene. Thus selected models were used to compute the “content” (or compositional) component of the gene score (Equation 1). Use of the GC index eliminated the computationally taxing need to visit all the 82 states corresponding to the “atypical” models.

Still, the log-odds formulation excluded some alternative paths that could be present in a full GHMM implementation. For instance, we did not directly compare the log-odds score produced by the typical model to that of the atypical model. Rather, we first selected the type of the model of protein-coding sequence (atypical or typical (native)) by comparing the probabilities of the two models, as shown in Equation 2. Here, was set to the type (typical or atypical) depending on which of the two coding models in Equation 2 ( vs , respectively) yielded the larger value. We then used the models of that type (i.e. typical or atypical versions of and ) to compute the log-odds scores defined in Equations 3 and 4.

For a potential protein-coding sequence with start codon , stop codon , and upstream sequence , the gene start score was defined by Equation 2 and the rest of the protein-coding score was defined by Equation 3. Here, denotes the sequence of the (potential) RBS or promoter related box, *k* is the site length, *ϕ* denotes the GC content, and *Ma* denotes the sequence model associated with state *a*. The length distributions of prokaryotic protein-coding and non-coding regions (approximated by a gamma-function and an exponential function, respectively), contributed the duration values into Equation 3. The last term in Equation 3 is the log-odds score determined by these durations. The constant *C* depends on parameters *Dc* and *Dn* of the gamma (protein-coding) and exponential (intergenic, non-coding) length distributions, respectively.

Finally, the overlapping genes were penalized based on the length of the overlap. In particular, for overlapping genes *a* and *b* with lengths La and Lb, respectively, and length of overlap *m*, a penalty *Sovlp* was added to the score (Equation 5).

Equation 1

Equation 2

Equation 3

Equation 4

Equation 5

**Building the models of sequences around the gene starts**

***The sequence of steps***. The identification of the type of regulatory site model goes in parallel with the genome group assignment (Fig. S1). The candidate groups are tested in a particular order, and the genome is assigned to the first group for which the ‘membership’ test is successful. The process differs slightly for archaeal and bacterial genomes, where an archaea genome is tested against groups D, B, A, X (in that order), while a bacterial genome is tested against groups C, B, A, X. If a genome’s domain (i.e. archaeal or bacterial) is not known, then all groups are tested in the order D, C, B, A, and X.

***Group D models***. This model assumes a presence of both leadered and leaderless transcription. Therefore, both the promoter and the RBS models are to be determined. There are two ways that an archaeon can be assigned to Group D; the first method works well when the percentage of leaderless transcripts in the genome is high, and the second caters specifically to the case when leaderless transcripts are less frequent. The two methods only differ in the way the training sequences for the promoter and RBS models are selected.

In the first method, we select the 40 nt long fragments upstream to *all* FGIOs and run GibbsL to possibly detect a 12 nt long motif of the -26 box of the archaeal promoter ([Bell and Jackson 1998](#_ENREF_4)). On the other hand, we also run GibbsL on the 20 nt long fragments from all IGIO to find the 6 nt long RBS pattern. If the detected promoter motif is *localized at a distance* larger than 14 nt (with the 10% mode threshold) then this genome is assigned to Group D.

If this condition does not hold, then the method two is applied to detect a lower percentage of leaderless transcripts. In the second method, we choose a set of 20 nt long fragments located upstream to all the FGIOs, and single out those that show a local similarity to the *extended Shine-Dalgarno sequence TA****AGGAGG****TGA* (by checking for 4 consecutive nucleotide matches, with one possible U-G type substitution). This search divides the set of FGIOs into two sets, ones with the upstream fragments having the SD similarity (set X) and ones with upstream fragments having no SD similarity (set Y). We extend set X by adding the 20 nt fragments located upstream to all the IGIOs (expecting them to contain subsequences similar to SD-RBS). Then, we run GibbsL on set X to find the 6 nt long RBS pattern. In a parallel step, we look into set Y to select the 40 nt long fragments upstream to FGIOs and use GibbsL to find the 12 nt long motif. The rational for this is a search for the B Recognition Element (BRE) that in archaea may be located just upstream to the TATA box ([Bell and Jackson 1998](#_ENREF_4); [Gehring et al. 2016](#_ENREF_18)). Again, the localization distance is checked to be larger than 14 nt at a 10% mode threshold. If the condition is satisfied, then the genome is assigned to Group D. It is possible that set Y is sufficiently large but the training the promoter model may not have conclusive results. This may happen when the set Y contains fragments with non-SD RBS (thus, the search for similarity with the extended SD sequence would not produce the desired result). If so, we proceed to derive the Group B model (see below). An example of a Group D genome is *Halobacterium salinarum* where more than 70% of operons have leaderless transcription (Fig. S6).

***Group C models***. This model is determined for bacterial genomes under assumption that both leadered and leaderless transcription occur along the genome. The approach is similar to the one used for the derivation of the Group D model described above. In bacteria with possible instances of leaderless transcription we model the -10 promoter box (with length ~6 nt) which is the closest promoter site to TSS.

We select a set X of the FGIOs for which the 20 nt long upstream fragments have a local similarity to the extended Shine-Dalgarno sequence *TA****AGGAGG****TGA*. This set is then augmented with the 20 nt long fragments located upstream to all the IGIO genes, thus giving us the input set of fragments on which GibbsL is executed to find the 6 nt long RBS motif. Next, we take the set of 20 nt long fragments located upstream to the genes in set Y and run GibbsL to detect the 6 nt long motif of the bacterial promoter box (-10). If we find a motif with the *localization distance* satisfying the 25% threshold, then the genome is assigned to Group C. An example of a Group C species is *Mycobacterium tuberculosis*. (Fig. S5).

Having examined many bacterial species, we observed that, in some cases, the two motifs derived from sets X and Y could be very similar. Since set Y could not produce an SD-RBS motif (given the way set Y was selected) and that set X could not produce a bacterial promoter motif (given the prevalence of IGIOs in set X), it is unlikely that the motifs from set X and Y (when similar) constitute either an SD-RBS or a promoter. Therefore, in that case, we proceed with the Group B membership test, where (all) genes may have a non-SD RBS.

***Group B models***. This type of model is derived for the genomes with the pattern derived for FGIOs is similar to the pattern derived for IGIOs while the consensus of this pattern differs from the one of Shine-Dalgarno. This outcome is observed, e.g., in *Flavobacteriia*, *Bacteriodia* and *Cytophagia*. Since this pattern is present in IGIOs, it cannot be related to a promoter; as such, the Group B model could be characterized as a non-SD RBS.

To identify such a case, we compare the consensus sequences of the two motifs (from sets X and Y, as described above) derived in Group C. If the two consensus sequences share three or more *consecutive* nucleotides (out of 6), they cannot make the distinct promoter & RBS pair as in Group C.

No test is needed for archaeal genomes since the promoter is located more than 15 nt away from gene-start. This distance is large for an RBS (thus eliminating archaea from potentially be detected as a non-SD RBS along the line of this logic).

If the matching condition is satisfied, we derive a single 6 nt long motif by the GibbsL alignment of the 20 nt upstream regions of all the genes. Next, the consensus sequence of this motif is compared to the extended Shine-Dalgarno sequence. A significant match to the extended SD sequence constitutes at least four consecutive nucleotide identities (allowing for U-G type substitutions). If such a similarity is not present, while the motif is well localized (i.e. the peak of its position distribution is more than 15%), then we conclude that the single non-SD RBS motif is in place for this Group B genome. Otherwise, we continue with the membership test for Group A (see below). An example of a Group B genome is *Bacterioides ovatus,* (Fig. S4).

***Group A models***. This single-motif model describes the translation initiation with the SD type RBS, the *most frequent* case in the prokaryotic genomes we have studied. To derive the models for this group, we run GibbsL on the set of 20 nt long upstream regions of all the predicted genes. Next, we compute the fraction of *predicted* RBS sites (among all predicted genes longer than 300 nt) that show a local similarity to the extended Shine-Dalgarno sequence (see above). If such a fraction exceeds 0.5, then the genome is assigned to Group A; otherwise, we proceed with the step described below. An example of a Group A species is *E. coli*. (Fig. S3).

***Group X models***. Genomes that do not pass any of the above group membership tests are lumped together in Group X. It seems that these genomes mostly use leadered transcription (since no promoter can be identified near gene-start) but do not have an identifiable RBS. Still, the SD type RBS model could be valid for some genes. To derive this model, we select the genes whose 20 nt upstream regions contain a local similarity to the extended Shine-Dalgarno sequence. The common RBS motif is derived from this set by GibbsL. For all remaining genes, the algorithm derives the “extended upstream signature” model, a 2nd order positional frequency model generated from the alignment of the upstream sequences with respect to the predicted gene starts.

An example of a Group X genome is *Synechosystis* (Fig. S7).

**Motif search by GibbsL**

The GibbsL algorithm works with a set of *N* sequences such as DNA sequences located upstream to predicted gene starts. We assume for simplicity that all sequences have the same length *L*. Let be the vector of positions, where indicates the start position of the predicted motif of fixed length *W* in sequence . The part of sequence that does not belong to the motif is called the “background.”

The set of motifs can be used to define patrameters of the positional (non-uniform) Markov model, . The set of parameters of the model is also known as a positional probability matrix (PPM).

Then the probability of the motif sequence under a zero-order model is:

Here are the nucleotides in at positions . The background parts of the sequences are used to define parameters of the “background” model, a uniform Markov model, .

Finally, we account for the positions of motifs relative to a fixed pivot. In our case, this condition imposes a preference on the distances of the motifs to the 3’end of the upstream sequence (which, in GeneMarkS-2, is usually at the gene-start location). This is in contrast to other motif finding algorithms that assume a uniform distribution over all positions in a sequence, meaning that the likelihood of a fragment being a valid motif is independent of where it occurs in the sequence. While this assumption is valid in the general case (i.e. when the context is unknown), the fact that RBS’s tend to be at a reasonably conserved range of positions from gene-starts allows us to impose a stricter requirement. To do that, we assume that there is a distribution of probabilities, , for a motif to start in a given position defined over *L-W+1* possible starting positions. Collectively, the models are designated by .

Now, the probability of alignment of all motifs (putative functional sites) along with flanking background sequences can be expressed as follows.

At each iteration, the distribution from which a new motif position in sequence is sampled is defined by the normalization with respect to the sequence having no motif at all (i.e. generated entirely by the background model). This is defined as

The overall model, , is updated each time a new motif position is sampled.

This process is repeated in iterations, and favors the assignments of motif positions that maximize the alignment score : the log of the probability of aligned sequences with given motif positions, computed using the , and models divided by the probability of the same sequences computed solely by the model:

Here is the size of the alphabet (e.g. 4 in the case of nucleotidies). The function is the number of times element appears in position of the predicted motifs, and is the number of times motifs are located at position . Similarly, , , and are the probabilities of symbol in the motif at position , symbol in the background, and the motif start location , respectively. After each *K* iterations, it is checked if a *shifted* form of the motif model results in a larger score . This involves shifting all motifs by a small set of integer values , and comparing the score of the new alignment for each of these values. This allows the algorithm to escape local optimums and, thus, construct alignments with higher scores.

**Effects of the RBS Motif Width on the Gene Start Accuracy**

To support the default motif width (6nt) used for RBS motifs, we tested out varying widths (from 5 to 10), and showed the overall gene-start accuracy on the genomes with experimentally verified starts. As is shown in Table S3, the motif width generally has little effect on the start accuracy, peaking at widths 6 and 9. Furthermore, we showed that in the case of *E. coli*, theRBS motifs wider than 6nt did not seem to capture additional information missed by the 6nt motif model (Fig. S12), which led us to settle on 6nt as the default value.

**Effects of the Addition of the Length Distribution Terms in GibbsL**

A canonical form of the Shine-Dalgarno (SD) ribosomal binding site (RBS) motif is represented as AGGAGG. The abundance of G’s in that sequence indicates that random sequences with high GC are more likely to exhibit similar hexamers than low GC sequences.

Consider, then, the task of searching for an RBS motif in upstream intergenic regions of length 40 nt in high GC genomes. Suppose that one of these upstream sequences has an RBS motif at a distance 6 nt from the gene start. Also assume, given it’s high GC nature, that that sequence has a rich-in-G hexamer located further down at a distance of 32 (way beyond the expected location of an RBS).

If the motif search algorithm does not take distance into account, then it will equally likely choose between these two candidates, and may choose the (incorrect) farther hexamer over the real RBS motif. In the case of GibbsL, however, the distribution over RBS positions (derived from the remaining upstream sequences) is used to handle these quasi tie-breakers by preferring motifs localized in the same region. Figures S9 an S10 clearly shows that this effect is growing as the GC of the sequence increases (in the case of RBS search).

**Analysis of the distribution of the False Negative predictions of COG supported genes**

After running all gene-finders on the 145 genomes containing the COG supported genes, we compared the genes missed by GeneMarkS-2, Prodigal, and Glimmer. As shown in Fig. S13, all three gene finders miss 350 COG genes. We found that 188 of these genes were characterized as hypothetical proteins. From the remaining 162, 32 are 50S ribosomal proteins (with L36 being the most common of these proteins, 17 times), 18 labeled as transposase, and 7 are 30S ribosomal proteins. It is interesting that the combination of GeneMarkS-2 and Glimmer3 would miss a smaller number of genes than the combination of GeneMarkS-2 and Prodigal. This observation suggests that GeneMarkS-2 and Prodigal have more in common than GeneMarkS-2 and Glimmer.

**Supplementary Figures**

**Figure S1.** This figure describes the procedure of deriving the type and parameters of the model of a sequence around gene start (models A through D, and X). See Suppl. Methods for details.

**---------------------------------------------------------------------------**


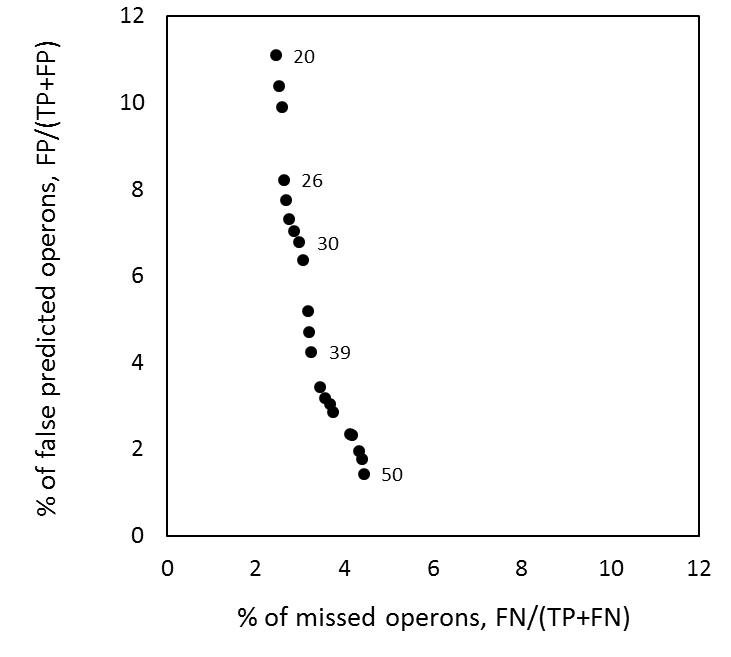


**Figure S2.** Dependence of false negative and false positive errors made in detection of the *E. coli* operons on the algorithm parameter (the max distance (L) between genes in the same operon, see main text)*.* The computations used the operon coordinates from RegulonDB and gene coordinates from the RefSeq annotation at NCBI. The labels near the dots show the values of the max distance thresholds. The false negative rate is less sensitive to increase of L than the false positive rate. Particularly, increase of L from 25nt to 40nt makes ~6% reduction in false positive rate and ~1% change in false negative rate.

------------------------------------------------------------------

**Models of the signal sequences situated close to gene starts. Groups A, B, C, D, X**

**Figure S3.** Group A: In species of this group genes are transcribed in the leadered fashion and the transcripts have Shine-Dalgarno RBS. We show here the SD RBS motif (logo) and the spacer length distribution for *Escherichia coli*. The consensus of the observed localized motif (with localization mode ~ 6nt) does match the SD sequence. Note that while the logo is shown in the 5’ to 3’ direction of the nucleotide sequence with the gene start assumed to be on the right, the spacer length distribution is shown in positive ‘distance scale’ instead of the negative scale of ‘biological’ co-ordinates.

-----------------------------------------------

**Figure S4.** Group B: In the species of this group genes are transcribed in the leadered fashion and the transcripts have non-Shine-Dalgarno RBS. We show the non-SD RBS motif (logo) and the spacer length distribution for *Bacteroides ovatus*. The consensus of the observed localized motif (with localization mode ~ 9nt) does not match the SD sequence.

-----------------------------------------------------

**Figure S5.** Group C: Bacterial species which genes have both leadered and leaderless transcription. Here for the genome of *M. tuberculosis*, we show A) the promoter motif (leaderless transcription) and spacer length distribution; B) the RBS motif and spacer length distribution.

------------------------------------------

**Figure S6.** Group D: Archaeal species which genes have both leadered and leaderless transcription. Here for the genome of *H. salinarum* we show A) the promoter motif (leaderless transcription) and spacer length distribution; B) the RBS motif and spacer length distribution.

---------------------------------------------

**Figure S7.** Group X: Genomes of this type have weak a RBS signal. We attempted to extract the RBS motif from the gene upstream regions had 4nt match to the extended SD sequence (see the Main text and Suppl. Materials). We show here the RBS motif (logo) and the spacer length distribution for *Synechocystis*.


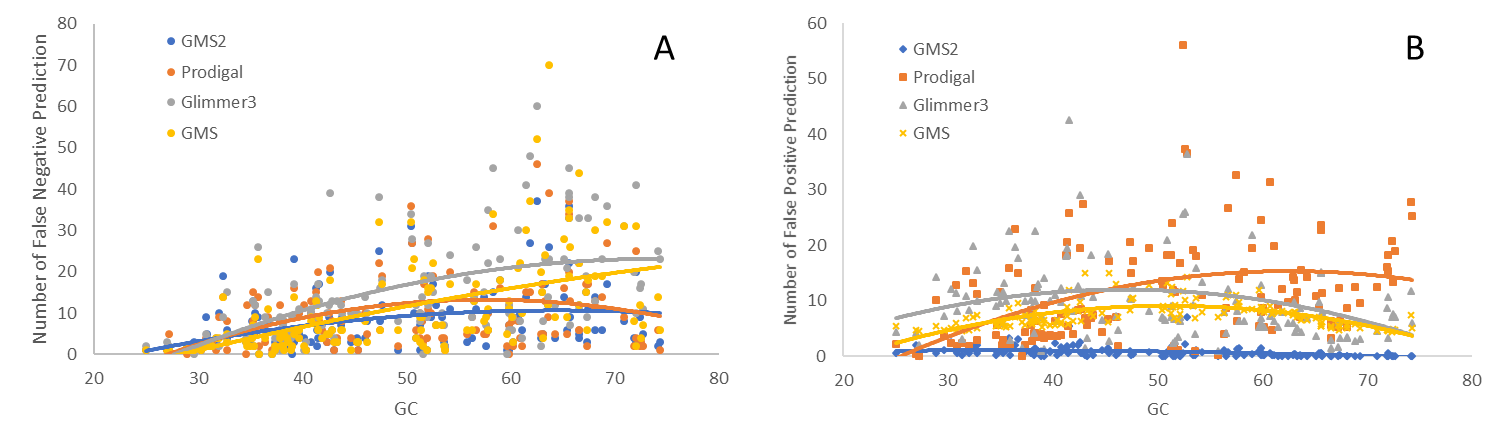


**Figure S8**: Numbers of false negative predictions (Panel A) and false positive (Panel B) as functions of the whole genome GC content. The false negative predictions (missed annotated genes) were defined on the set of the COG annotated genes.

**Figure S9:** The graphs show distributions of spacer lengths (relative to gene starts) derived by GibbsL (with and without the localization correction) for five genomes with varying GC. For each genome, the motif search was executed with upstream regions of lengths 40 (left panels) and 20 (right panels). From top to bottom, the species are: *Fusobacterium nucleatum* (GC = 27.2%), *Thermotoga maritima* (GC = 46.2%), Escherichia coli CFT073 (GC = 50.5%), Pseudomonas aeruginosa (GC = 66.6%), *Thermobispora bispora* (GC = 72.4%). As the GC content increases, we see that the GibbsL distance correction feature facilitates more compact localization of the selected motifs.

Reduction of the length of upstream segments from 40nt to 20nt slightly improved the outcomes of GibbsL without localization correction feature as more narrow set of the hexamers were admitted to competition. Thus, GibbsL has better performance both in case of high GC as well as in case of longer upstream regions.

---------------------------------------------------------

**Figure S10:** The motif logos that come from the five experiments described in Figure S9. The logos derived when the GibbsL localization correction feature is disabled tend to have stronger G’s and A’s in the middle. This happens because the algorithm has more freedom in choosing motifs that can perfectly maximize the frequencies of conserved nucleotides, without taking into account that the motif may deviate too far from the gene start. The length of the upstream regions is 40nt. The left column shows the results when the localization correction is disabled; the right column shows the results with the feature enabled. Each row corresponds to a single species. From top to bottom: *Fusobacterium nucleatum* (GC = 27.2%), *Thermotoga maritima* (GC = 46.2%), *Escherichia coli CFT073* (GC = 50.5%), *Pseudomonas aeruginosa* (GC = 66.6%), *Thermobispora bispora* (GC = 72.4%). See more comments in the legend to Fig. S1.

----------------------------------------------------------------------------

**Figure S11:** These images show the logos of the RBS motifs found by GibbsL for *Thermobispora bispora* (GC = 72.4%) when the length of the upstream regions is 20nt. The left panel shows the result of GibbsL with the localization correction disabled; the right panel - with this feature enabled.

---------------------------------------------------

**Figure S12**. Motif logos for *E. coli* derived in runs of GeneMarkS-2 with differently assigned widths of the RBS motif (5nt through 10nt).

**Figure S13**: Distribution of deviation of average gene GC content from average genome GC content for both native (typical) and atypical genes.

**Figure S14.** The Venn diagram for the COG genes missed by the three gene finders. Of the 1,605 (1,359 + 246) genes missed only by Glimmer3 and not by GeneMarkS-2, the atypical model in GeneMarkS-2 predicts 42% (679) of them, with the rest predicted by the typical model. Similarly, for the 780 (534 + 246) genes missed by Prodigal and not by GeneMarkS-2, the atypical model predicts 30% (233) of them.

-----------------------------------------

**Figure S15.** The motif logo and the spacer length distribution of *Flavobacterium frigiarium*, a group B genome.

------------------------------------------------------

**Figure S16.** The motif logo and the spacer length distribution for a 15nt motif signal, for two group B genomes: (A) *Bacteroides vulgatus and* (B) *Flavobacterium johnsoniae*. Note that while the logo is shown in the 5’ to 3’ direction of the nucleotide sequence with the gene start assumed to be on the right, the spacer length distribution is shown in positive ‘distance scale’ instead of the negative scale of ‘biological’ co-ordinates. Distances from the starts were computed to the 3’ ends of the motifs shown in Panels A and B.

**Supplemental Tables**

**Table S1.** Names of 54 prokaryotic genomes with sets of genes supported by proteomic data (*See file Supplemental_Table_S1.xlsx).* Full description of these gene sets is given at <http://topaz.gatech.edu/GeneMark/GMS2/>

**Table S2.** Names of 145 prokaryotic genomes with the sets of genes annotated with reference to the COG database (*See file Supplemental_Table_S2.xlsx).* Full description of these gene sets is given at <http://topaz.gatech.edu/GeneMark/GMS2/>

**Table S3.** The dependence of the gene start accuracy on the RBS motif width; computed over the set of seven genomes with experimentally verified starts.

**Table S4:** Classification of ~5000 genomes into five groups, based on the group assignment made by GeneMarkS-2 (A through D, and X). (*See file Supplemental_Table_S4.pdf*)

**Table S5**: Test on 145 simulated non-coding sequences (100 kb each, average over 10 simulations). The numbers of false positives as observed in several length intervals

**Table S6**: Test on the 100k simulated non-coding sequences (generated by the zero order model) appended to the original genome. Training of each tool was done on the 145 thus prepared constructs. False positives were calculated only within the simulated intergenic sequences.
