# Supplementary material for: Modeling leaderless transcription and atypical genes results in more accurate gene prediction in prokaryotes
Source: HighWire-hosted journal article supplement (doi:10.1101/gr.230615.117), 2018-05-17
Supplement: Supplemental_Table_S1.xlsx [file Supplemental_Table_S1.xlsx]

## Sheet: Sheet1
Acidiphilium_cryptum_JF_5_uid58447
Actinosynnema_mirum_DSM_43827_uid58951
Anabaena_variabilis_ATCC_29413_uid58043
Arthrobacter_FB24_uid58141
Bacillus_anthracis_Sterne_uid58091
Borrelia_burgdorferi_B31_uid57581
Brachybacterium_faecium_DSM_4810_uid58649
Bradyrhizobium_japonicum_USDA_110_uid57599
Burkholderia_mallei_SAVP1_uid58387
Candidatus_Pelagibacter_ubique_HTCC1062_uid58401
Caulobacter_crescentus_NA1000_uid59307
Cellulomonas_flavigena_DSM_20109_uid48821
Chlorobium_tepidum_TLS_uid57897
Chloroflexus_aurantiacus_J_10_fl_uid57657
Cryptobacterium_curtum_DSM_15641_uid59041
Cyanothece_ATCC_51142_uid59013
Cyanothece_PCC_7425_uid59435
Cyanothece_PCC_7822_uid52547
Deinococcus_radiodurans_R1_uid57665
Desulfovibrio_alaskensis_G20_uid57941
Desulfovibrio_vulgaris_Hildenborough_uid57645
Ehrlichia_chaffeensis_Arkansas_uid57933
Escherichia_coli_O157_H7_EDL933_uid57831
Geobacter_metallireducens_GS_15_uid57731
Geobacter_uraniireducens_Rf4_uid58475
Halogeometricum_borinquense_DSM_11551_uid54919
Halorhabdus_utahensis_DSM_12940_uid59189
Heliobacterium_modesticaldum_Ice1_uid58279
Kineococcus_radiotolerans_SRS30216_uid58067
Leptospira_interrogans_serovar_Copenhageni_Fiocruz_L1_130_uid58065
Methanosarcina_barkeri_Fusaro_uid57715
Methanospirillum_hungatei_JF_1_uid58181
Mycobacterium_tuberculosis_H37Rv_uid57777
Nakamurella_multipartita_DSM_44233_uid59221
Nocardiopsis_dassonvillei_DSM_43111_uid49483
Novosphingobium_aromaticivorans_DSM_12444_uid57747
Pelobacter_carbinolicus_DSM_2380_uid58241
Prochlorococcus_marinus_pastoris_CCMP1986_uid57761
Rhodobacter_capsulatus_SB_1003_uid47509
Rhodopseudomonas_palustris_CGA009_uid62901
Roseiflexus_castenholzii_DSM_13941_uid58287
Saccharomonospora_viridis_DSM_43017_uid59055
Salmonella_enterica_serovar_Typhi_Ty2_uid57973
Salmonella_enterica_serovar_Typhimurium_LT2_uid57799
Sanguibacter_keddieii_DSM_10542_uid40845
Slackia_heliotrinireducens_DSM_20476_uid59051
Stackebrandtia_nassauensis_DSM_44728_uid46663
Streptococcus_pyogenes_M1_GAS_uid57845
Synechococcus_PCC_7002_uid59137
Synechocystis_PCC_6803_uid57659
Syntrophobacter_fumaroxidans_MPOB_uid58177
Thermobispora_bispora_DSM_43833_uid48999
Xylanimonas_cellulosilytica_DSM_15894_uid41935
Yersinia_pestis_KIM_10_uid57875
