# Supplementary material for: Modeling leaderless transcription and atypical genes results in more accurate gene prediction in prokaryotes
Source: HighWire-hosted journal article supplement (doi:10.1101/gr.230615.117), 2018-05-17
Supplement: Supplemental_Table_S2.xlsx [file Supplemental_Table_S2.xlsx]

## Sheet: Sheet1
Acidaminococcus_fermentans_DSM_20731_uid43471
Aeropyrum_pernix_K1_uid57757
Aminobacterium_colombiense_DSM_12261_uid47083
Anabaena_variabilis_ATCC_29413_uid58043
Anaplasma_phagocytophilum_HZ_uid57951
Aquifex_aeolicus_VF5_uid57765
Arthrobacter_FB24_uid58141
Bacillus_anthracis_Sterne_uid58091
Bacillus_anthracis__Ames_Ancestor__uid58083
Bacillus_cereus_ATCC_10987_uid57673
Bacillus_cereus_ATCC_14579_uid57975
Bacillus_halodurans_C_125_uid57791
Bacillus_subtilis_BSn5_uid62463
Bacteroides_thetaiotaomicron_VPI_5482_uid62913
Bifidobacterium_longum_NCC2705_uid57939
Brachybacterium_faecium_DSM_4810_uid58649
Caldivirga_maquilingensis_IC_167_uid58711
Candidatus_Nitrospira_defluvii_uid51175
Candidatus_Protochlamydia_amoebophila_UWE25_uid58079
Caulobacter_crescentus_CB15_uid57891
Cellulomonas_flavigena_DSM_20109_uid48821
Chlorobium_limicola_DSM_245_uid58127
Chlorobium_tepidum_TLS_uid57897
Chloroflexus_aurantiacus_J_10_fl_uid57657
Clostridium_acetobutylicum_ATCC_824_uid57677
Clostridium_thermocellum_ATCC_27405_uid57917
Coxiella_burnetii_RSA_493_uid57631
Cryptobacterium_curtum_DSM_15641_uid59041
Cyanothece_ATCC_51142_uid59013
Deferribacter_desulfuricans_SSM1_uid46653
Deinococcus_deserti_VCD115_uid58615
Deinococcus_radiodurans_R1_uid57665
Desulfovibrio_alaskensis_G20_uid57941
Desulfovibrio_vulgaris_Hildenborough_uid57645
Enterococcus_faecalis_V583_uid57669
Erwinia_tasmaniensis_Et1_99_uid59029
Escherichia_coli_CFT073_uid57915
Escherichia_coli_O157_H7_EDL933_uid57831
Fusobacterium_nucleatum_ATCC_25586_uid57885
Gemmatimonas_aurantiaca_T_27_uid58813
Geobacter_sulfurreducens_PCA_uid57743
Geobacter_uraniireducens_Rf4_uid58475
Haemophilus_ducreyi_35000HP_uid57625
Haemophilus_influenzae_Rd_KW20_uid57771
Haemophilus_somnus_2336_uid57979
Halobacterium_salinarum_R1_uid61571
Halogeometricum_borinquense_DSM_11551_uid54919
Halorhabdus_utahensis_DSM_12940_uid59189
Helicobacter_hepaticus_ATCC_51449_uid57737
Helicobacter_pylori_26695_uid57787
Helicobacter_pylori_J99_uid57789
Hyperthermus_butylicus_DSM_5456_uid57755
Kineococcus_radiotolerans_SRS30216_uid58067
Lactobacillus_johnsonii_NCC_533_uid58029
Lactococcus_lactis_Il1403_uid57671
Legionella_pneumophila_Philadelphia_1_uid57609
Leptospira_interrogans_serovar_Copenhageni_Fiocruz_L1_130_uid58065
Listeria_monocytogenes_serotype_4b_F2365_uid57689
Mesoplasma_florum_L1_uid58055
Mesorhizobium_loti_MAFF303099_uid57601
Methanocaldococcus_jannaschii_DSM_2661_uid57713
Methanococcoides_burtonii_DSM_6242_uid58023
Methanosarcina_acetivorans_C2A_uid57879
Methanosarcina_barkeri_Fusaro_uid57715
Methanosarcina_mazei_Go1_uid57893
Methylococcus_capsulatus_Bath_uid57607
Mycobacterium_avium_paratuberculosis_K_10_uid57699
Mycobacterium_bovis_AF2122_97_uid57695
Mycobacterium_leprae_TN_uid57697
Mycobacterium_smegmatis_MC2_155_uid57701
Mycobacterium_tuberculosis_CDC1551_uid57775
Mycobacterium_tuberculosis_H37Rv_uid57777
Mycoplasma_agalactiae_uid46679
Mycoplasma_genitalium_G37_uid57707
Mycoplasma_mobile_163K_uid58077
Nakamurella_multipartita_DSM_44233_uid59221
Natrialba_magadii_ATCC_43099_uid46245
Natronomonas_pharaonis_DSM_2160_uid58435
Neisseria_meningitidis_053442_uid58587
Neisseria_meningitidis_MC58_uid57817
Nocardiopsis_dassonvillei_DSM_43111_uid49483
Nostoc_PCC_7120_uid57803
Nostoc_punctiforme_PCC_73102_uid57767
Pasteurella_multocida_Pm70_uid57627
Persephonella_marina_EX_H1_uid58119
Pirellula_staleyi_DSM_6068_uid43209
Prochlorococcus_marinus_CCMP1375_uid57995
Prochlorococcus_marinus_pastoris_CCMP1986_uid57761
Pseudomonas_aeruginosa_PAO1_uid57945
Pseudomonas_putida_KT2440_uid57843
Pseudomonas_syringae_tomato_DC3000_uid57967
Pyrobaculum_aerophilum_IM2_uid57727
Pyrobaculum_neutrophilum_V24Sta_uid58421
Pyrococcus_abyssi_GE5_uid62903
Pyrococcus_furiosus_DSM_3638_uid57873
Pyrococcus_horikoshii_OT3_uid57753
Pyrococcus_yayanosii_CH1_uid68281
Rhodobacter_capsulatus_SB_1003_uid47509
Rhodobacter_sphaeroides_2_4_1_uid57653
Rickettsia_conorii_Malish_7_uid57633
Rickettsia_typhi_Wilmington_uid58063
Roseiflexus_castenholzii_DSM_13941_uid58287
Saccharomonospora_viridis_DSM_43017_uid59055
Salmonella_enterica_serovar_Choleraesuis_SC_B67_uid58017
Salmonella_enterica_serovar_Paratyphi_B_SPB7_uid59097
Sanguibacter_keddieii_DSM_10542_uid40845
Shigella_flexneri_2a_301_uid62907
Sinorhizobium_meliloti_AK83_uid52607
Slackia_heliotrinireducens_DSM_20476_uid59051
Stackebrandtia_nassauensis_DSM_44728_uid46663
Staphylococcus_aureus_ED98_uid41455
Staphylococcus_epidermidis_ATCC_12228_uid57861
Streptococcus_pneumoniae_R6_uid57859
Streptococcus_pneumoniae_TIGR4_uid57857
Streptococcus_pyogenes_M1_GAS_uid57845
Streptococcus_pyogenes_MGAS315_uid57911
Streptomyces_coelicolor_A3_2__uid57801
Sulfolobus_acidocaldarius_DSM_639_uid58379
Sulfolobus_solfataricus_P2_uid57721
Sulfolobus_tokodaii_7_uid57807
Synechococcus_CC9311_uid58123
Synechococcus_PCC_7002_uid59137
Synechocystis_PCC_6803_uid57659
Syntrophobacter_fumaroxidans_MPOB_uid58177
Thermobispora_bispora_DSM_43833_uid48999
Thermococcus_gammatolerans_EJ3_uid59389
Thermococcus_kodakarensis_KOD1_uid58225
Thermococcus_onnurineus_NA1_uid59043
Thermococcus_sibiricus_MM_739_uid59399
Thermodesulfatator_indicus_DSM_15286_uid68285
Thermofilum_pendens_Hrk_5_uid58563
Thermoplasma_acidophilum_DSM_1728_uid61573
Thermoproteus_uzoniensis_768_20_uid65089
Thermotoga_maritima_MSB8_uid57723
Treponema_denticola_ATCC_35405_uid57583
Treponema_pallidum_Nichols_uid57585
Truepera_radiovictrix_DSM_17093_uid49533
Vibrio_cholerae_O1_biovar_El_Tor_N16961_uid57623
Vibrio_fischeri_ES114_uid58163
Vulcanisaeta_distributa_DSM_14429_uid52827
Xanthomonas_campestris_ATCC_33913_uid57887
Xanthomonas_oryzae_KACC_10331_uid58155
Xylanimonas_cellulosilytica_DSM_15894_uid41935
Xylella_fastidiosa_9a5c_uid57849
Yersinia_pestis_KIM_10_uid57875
